# Supplementary material
Source: PubMed Central journal article supplement (PMC4219530)
Supplement: NIHMS616312-supplement-01.pdf [file NIHMS616312-supplement-01.pdf]

|             |                       | Total population<br>(N=44)<br>Mean ± SE | Microarray subjects        |                             |
|-------------|-----------------------|-----------------------------------------|----------------------------|-----------------------------|
|             |                       |                                         | Lean<br>(N=7)<br>Mean ± SE | Obese<br>(N=7)<br>Mean ± SE |
| Procedure   | Hernia/Fundoplication | 20                                      | 5                          | 5                           |
|             | Bariatric             | 16                                      | 1                          | 2                           |
|             | Gallbladder           | 4                                       | 1                          | 0                           |
|             | Other                 | 4                                       | 0                          | 0                           |
| History     | CVD or hypertension   | 29                                      | 4                          | 6                           |
|             | Dyslipidemia          | 15                                      | 5                          | 3                           |
|             | Endocrine disorder    | 18                                      | 4                          | 4                           |
|             | Type II diabetes      | 5                                       | 0                          | 0                           |
|             | Arthritis             | 3                                       | 0                          | 1                           |
| Medications | anti-hypertensive     | 24                                      | 3                          | 5                           |
|             | anti-lipid            | 15                                      | 2                          | 3                           |
|             | non-estrogen hormone  | 16                                      | 5                          | 3                           |
|             | antibiotics           | 4                                       | 0                          | 2                           |
|             | Anti-inflammatory     | 2                                       | 0                          | 1                           |

**Table S1.** Surgery, medical history and medications of the total population and subjects whose adipocyte samples were isolated by microarray.

|                    | SS. <i>IFNG</i>          | N  |
|--------------------|--------------------------|----|
| Age                | <b>0.49<sup>a</sup></b>  | 23 |
| BMI                | <b>0.37<sup>b</sup></b>  | 23 |
| BAI                | 0.32                     | 22 |
| WHR                | <b>0.45<sup>a</sup></b>  | 22 |
| FPG                | 0.08                     | 23 |
| TG                 | <b>0.42<sup>b</sup></b>  | 22 |
| HDL                | -0.14                    | 22 |
| SBP                | 0.11                     | 23 |
| DBP                | <b>-0.37<sup>b</sup></b> | 23 |
| FPI                | <b>0.58<sup>a</sup></b>  | 20 |
| Cholesterol        | -0.10                    | 22 |
| LDL                | -0.09                    | 22 |
| TNFA               | <b>0.58<sup>a</sup></b>  | 21 |
| Leptin             | <b>0.41<sup>b</sup></b>  | 21 |
| IL-6               | 0.22                     | 21 |
| MCP-1              | 0.09                     | 21 |
| hsCRP              | 0.03                     | 20 |
| HOMA-IR            | <b>0.54<sup>a</sup></b>  | 20 |
| Caspase-1 activity | <b>0.40<sup>b</sup></b>  | 20 |
| SA. <i>NLRP3</i>   | <b>0.37<sup>b</sup></b>  | 22 |
| SA. <i>PYCARD</i>  | <b>0.53<sup>a</sup></b>  | 22 |
| SA. <i>SOD2</i>    | -0.16                    | 22 |
| SA. <i>NQO1</i>    | 0.33                     | 20 |
| SA. <i>TNFA</i>    | <b>0.49<sup>a</sup></b>  | 22 |
| SA. <i>CCL2</i>    | 0.32                     | 22 |
| SA. <i>LEP</i>     | 0.26                     | 22 |
| SA. <i>IL1B</i>    | <b>0.44<sup>a</sup></b>  | 22 |
| SA. <i>CIITA</i>   | <b>0.42<sup>b</sup></b>  | 22 |
| SA. <i>HLA-DPB</i> | <b>0.46<sup>a</sup></b>  | 22 |
| SS. <i>CIITA</i>   | 0.22                     | 12 |
| SS. <i>HLA-DPB</i> | 0.18                     | 15 |
| SS. <i>NLRP3</i>   | 0.15                     | 23 |
| SS. <i>PYCARD</i>  | 0.28                     | 23 |

**Table S2.** Pearson correlation of human subcutaneous SVF (SS) *IFNG* expression, indicating significant correlation (<sup>a</sup>p<0.5) and trend (<sup>b</sup>p<0.1) towards correlation. The number of paired values available for each correlation is shown, with smaller numbers indicating missing values.

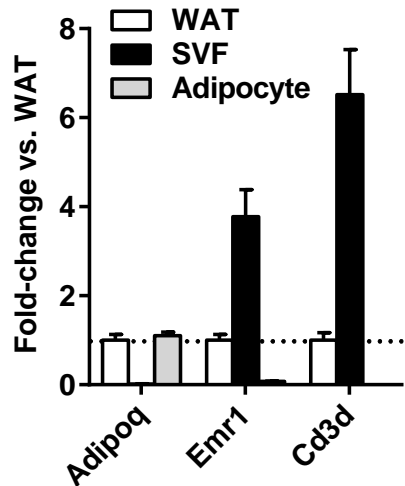

**Figure S1.** RT-PCR analysis of adipocyte (*Adipoq*), macrophage (*Emr1*), and T-cell-specific (*Cd3d*) mRNAs in human white adipose tissue (WAT), SVF and purified adipocyte samples (Mean±SEM, N=3-4).

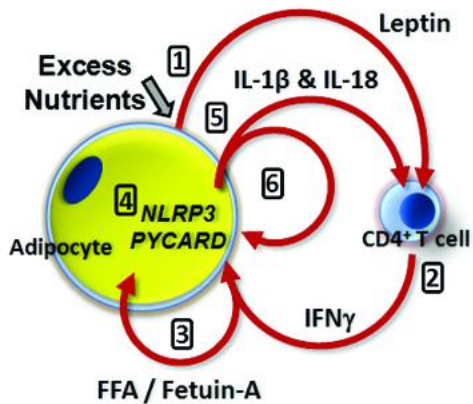

**Figure S2.** Schematic of a putative adipocyte and T cell interactions during obesity. Nutrient excess increases 1) adipocyte leptin secretion, which stimulates 2) IFN $\gamma$  release from adipose-resident T-cells. IFN $\gamma$  increases adipocyte lipolysis resulting in 3) increased FFA/Fetuin-A mediated TLR4-signaling. Both IFN $\gamma$  and TLR4 signaling additively induce 4) adipocyte NLRP3 and PYCARD expression, resulting in increased NLRP3 inflammasome activity and IL-1 $\beta$  and IL-18 secretion that can induce 5) further IFN $\gamma$  production, and 6) directly stimulate adipocyte NLRP3 inflammasome expression.
